# Supplementary material for: The Impact of Surgical Experience in VATS Lobectomy on Conversion and Patient Quality of Life: Results from a Comprehensive National Video-Assisted Thoracic Surgical Database
Source: MDPI journal article supplement (doi:10.3390/cancers15020410), 2023-01-08
Supplement: s1 [file s1]

|                                 | Model 1            | Model 2            | Model 3            |
|---------------------------------|--------------------|--------------------|--------------------|
| Observations                    | 4,341              | 4,341              | 4,164              |
| Age ≥70                         | 0.91<br>(0.097)    | 0.91<br>(0.087)    | 0.87<br>(0.096)    |
| Female gender                   | 0.90<br>(0.11)     | 0.90<br>(0.14)     | 0.91<br>(0.12)     |
| Preoperative neoadjuvant        | 1.32<br>(0.31)     | 1.32<br>(0.28)     | 1.68**<br>(0.43)   |
| FEV1 %                          | 0.99***<br>(0.003) | 0.99**<br>(0.003)  | 0.99*<br>(0.003)   |
| DLCO %                          | 1.00<br>(0.003)    | 1.00<br>(0.004)    | 1.00<br>(0.003)    |
| Clinical nodal involvement      | 1.42**<br>(0.21)   | 1.42**<br>(0.24)   | 1.71***<br>(0.27)  |
| Clinical Stage I                | 0.62***<br>(0.066) | 0.62***<br>(0.066) | 0.57***<br>(0.065) |
| Packages per year               | 1.00**<br>(0.001)  | 1.00**<br>(0.001)  | 1.00**<br>(0.001)  |
| Right lung                      | 0.93<br>(0.097)    | 0.93<br>(0.12)     | 0.91<br>(0.099)    |
| Previous cancer-related surgery | 0.94<br>(0.11)     | 0.94<br>(0.11)     | 0.93<br>(0.12)     |
| COPD                            | 1.18<br>(0.14)     | 1.12<br>(0.17)     | 1.19<br>(0.16)     |
| Healthcare centre dummy         | NO                 | NO                 | YES                |
| Pseudo R2                       | 0.023              | 0.023              | 0.098              |

\*\*\* p<0.01, \*\* p<0.05, \* p<0.1

Supplemental Table S1. Analysis of the impact of cluster correlation at the healthcare centre level. Multivariable logistic regression estimates are expressed in odds ratios. Dependent variable: 1 = conversion to open surgery, 0 = otherwise. Model 1 does not account for cluster correlation at the

healthcare centre level (i.e., standard errors were computed), model 2 computes standard errors corrected for cluster correlation at the healthcare centre level, and model 3 features standard errors and healthcare centre dummy variables.

| Variable                                    | VATS<br>No. = 10,698<br>(90.9%) | Converted<br>No. = 1,074 (9.1%) | <i>p-value</i> |
|---------------------------------------------|---------------------------------|---------------------------------|----------------|
| <b>Major</b>                                |                                 |                                 |                |
| • Prolonged mechanical ventilation          | 48 (0.5%)                       | 13 (1.2%)                       | 0.001          |
| • Postoperative ICU                         | 417 (4.0%)                      | 70 (6.5%)                       | <0.001         |
| <b>Cardiovascular</b>                       |                                 |                                 |                |
| • Atrial fibrillation                       | 668 (6.2%)                      | 118 (11.0%)                     | <0.001         |
| • Myocardial ischemia and infarction        | 21 (0.2%)                       | 6 (0.6%)                        | 0.018          |
| • Stroke                                    | 25 (0.2%)                       | 4 (0.4%)                        | 0.382          |
| <b>Acute cardiovascular</b>                 |                                 |                                 |                |
| • Acute peripheral arterial thromboembolism | 10 (0.1%)                       | 2 (0.2%)                        | 0.364          |
| • Cardiac arrest                            | 9 (0.1%)                        | 5 (0.5%)                        | 0.001          |
| <b>Pulmonary</b>                            |                                 |                                 |                |
| • Prolonged air leak                        | 858 (8.0%)                      | 116 (10.8%)                     | 0.002          |
| • Pulmonary embolism                        | 14 (0.1%)                       | 4 (0.4%)                        | 0.053          |
| • ARDS                                      | 36 (0.3%)                       | 12 (1.1%)                       | <0.001         |
| • Persistent pleural space                  | 301 (2.8%)                      | 32 (3.0%)                       | 0.755          |
| • Pneumonia                                 | 317 (3.0%)                      | 63 (6.0%)                       | <0.001         |
| • Mechanical ventilation                    | 36 (0.3%)                       | 18 (1.7%)                       | <0.001         |
| • Middle lobe torsion                       | 9 (0.1%)                        | 1 (0.1%)                        | 0.923          |
| • Atelectasis                               | 186 (1.7%)                      | 40 (3.7%)                       | <0.001         |
| • Sputum retention                          | 241 (2.3%)                      | 45 (4.2%)                       | <0.001         |
| <b>Surgical</b>                             |                                 |                                 |                |
| • Haemothorax                               | 127 (1.2%)                      | 19 (1.8%)                       | 0.100          |
| • Bronchopleural fistula                    | 19 (0.2%)                       | 6 (0.6%)                        | 0.010          |
| • Chylothorax                               | 37 (0.4%)                       | 2 (0.2%)                        | 0.385          |
| • Phrenic nerve injury/palsy                | 15 (0.1%)                       | 2 (0.2%)                        | 0.705          |
| • Recurrent laryngeal nerve palsy/dysphonia | 62 (0.6%)                       | 13 (1.2%)                       | 0.013          |
| • Blood transfusion                         | 175 (0.7%)                      | 70 (6.5%)                       | <0.001         |
| <b>Renal</b>                                |                                 |                                 |                |

|                                   |           |           |        |
|-----------------------------------|-----------|-----------|--------|
| • Acute renal failure             | 50 (0.5%) | 16 (1.5%) | <0.001 |
| • Urinary tract infection         | 62 (0.6%) | 4 (0.4%)  | 0.386  |
| • Dialysis                        | 8 (0.1%)  | 1 (0.1%)  | 0.836  |
| <b>Gastrointestinal</b>           |           |           |        |
| • Diarrhoea                       | 24 (0.2%) | 7 (0.7%)  | 0.009  |
| • Pancreatitis                    | 5 (0.0%)  | 1 (0.1%)  | 0.521  |
| • Intestinal infarction           | 4 (0.0%)  | 0 (0.0%)  | 0.526  |
| • Acute abdomen bowel obstruction | 21 (0.2%) | 5 (0.5%)  | 0.073  |

Supplemental Table S2. Complications in detail between non-converted and converted cases. P-value from  $\chi^2$  test reported. ARDS = adult respiratory distress syndrome; ICU = intensive care unit.

| Variable                                  | $\rho$ | $p$ -value |
|-------------------------------------------|--------|------------|
| Atrial fibrillation                       | 0.055  | <0.001     |
| Myocardial ischemia and infarction        | 0.022  | 0.018      |
| Stroke, ictus                             | 0.008  | 0.38       |
| Acute peripheral arterial thromboembolism | 0.008  | 0.36       |
| Cardiac arrest                            | 0.032  | 0.001      |
| Prolonged air leak                        | 0.029  | 0.002      |
| Pulmonary embolism                        | 0.018  | 0.053      |
| ARDS                                      | 0.035  | <0.001     |
| Persistent pleural space                  | 0.003  | 0.76       |
| Pneumonia                                 | 0.047  | <0.001     |
| Mechanical ventilation                    | 0.057  | <0.001     |
| Middle lobe torsion                       | 0.001  | 0.92       |
| Atelectasis                               | 0.042  | <0.001     |
| Sputum retention                          | 0.036  | <0.001     |
| Haemothorax                               | 0.015  | 0.10       |
| Bronchopleural fistula                    | 0.024  | 0.01       |
| Chylothorax                               | -0.008 | 0.39       |
| Phrenic nerve injury/palsy                | 0.004  | 0.71       |
| Recurrent laryngeal nerve palsy/dysphonia | 0.023  | 0.013      |
| Blood transfusion                         | 0.099  | <0.001     |
| Acute renal failure                       | 0.039  | <0.001     |
| Urinary tract infection                   | -0.008 | 0.39       |
| Dialysis                                  | 0.002  | 0.84       |
| Diarrhoea                                 | 0.024  | 0.009      |
| Pancreatitis                              | 0.006  | 0.52       |
| Intestinal infarction                     | -0.006 | 0.53       |
| Acute abdomen bowel obstruction           | 0.017  | 0.073      |
| Prolonged mechanical ventilation          | 0.031  | 0.001      |
| Postoperative ICU                         | 0.038  | <0.001     |

Supplemental Table S3. Spearman correlation test between conversion and complications in detail.

ARDS = adult respiratory distress syndrome; ICU = intensive care unit.

| Logistic regression      |                           |         |         |         |                               |         |         |         | Tobit regression              |           |           |           |
|--------------------------|---------------------------|---------|---------|---------|-------------------------------|---------|---------|---------|-------------------------------|-----------|-----------|-----------|
| Models                   | (1)                       | (2)     | (3)     | (4)     | (5)                           | (6)     | (7)     | (8)     | (9)                           | (10)      | (11)      | (12)      |
|                          | Conversion to thoracotomy |         |         |         | ≥1 postoperative complication |         |         |         | EuroQoL-5D score at discharge |           |           |           |
| Observations             | 6,363                     | 4,341   | 4,341   | 4,164   | 6,363                         | 4,341   | 4,341   | 4,340   | 6,348                         | 4,330     | 4,330     | 4,330     |
| >50 VATS lobectomies     | 0.78***                   | 0.84*   | 0.84    | 0.92    | 0.89*                         | 0.94    | 0.94    | 1.12    | 0.048***                      | 0.057***  | 0.057*    | 0.031**   |
|                          | (0.07)                    | (0.088) | (0.17)  | (0.13)  | (0.053)                       | (0.066) | (0.11)  | (0.10)  | (0.009)                       | (0.011)   | (0.034)   | (0.012)   |
| Age                      |                           | 1.00    | 1.00    | 0.99    |                               | 1.02*** | 1.02*** | 1.02*** |                               | -0.002*** | -0.002**  | -0.002*** |
|                          |                           | (0.006) | (0.006) | (0.006) |                               | (0.004) | (0.005) | (0.005) |                               | (0.001)   | (0.001)   | (0.001)   |
| Female gender            |                           | 0.90    | 0.90    | 0.90    |                               | 0.80*** | 0.80**  | 0.77*** |                               | -0.044*** | -0.044*** | -0.048*** |
|                          |                           | (0.11)  | (0.13)  | (0.12)  |                               | (0.066) | (0.07)  | (0.067) |                               | (0.013)   | (0.015)   | (0.011)   |
| BMI                      |                           | 1.00    | 1.00    | 1.00    |                               | 1.00    | 1.00    | 1.000   |                               | 0.001***  | 0.001***  | 0.000***  |
|                          |                           | (0.001) | (0.002) | (0.001) |                               | (0.001) | (0.002) | (0.001) |                               | (0.000)   | (0.000)   | (0.000)   |
| Packages per year        |                           | 1.00**  | 1.00**  | 1.00**  |                               | 1.00    | 1.00    | 1.000   |                               | -0.000**  | -0.000*** | -0.000**  |
|                          |                           | (0.001) | (0.001) | (0.001) |                               | (0.000) | (0.000) | (0.001) |                               | (0.000)   | (0.000)   | (0.000)   |
| Preoperative neoadjuvant |                           | 1.38    | 1.38    | 1.76**  |                               | 1.01    | 1.01    | 0.94    |                               | 0.006     | 0.006     | -0.008    |
|                          |                           | (0.33)  | (0.30)  | (0.45)  |                               | (0.19)  | (0.21)  | (0.18)  |                               | (0.03)    | (0.026)   | (0.027)   |
| FEV1 %                   |                           | 0.99*** | 0.99**  | 0.99**  |                               | 0.99*** | 0.99*** | 0.99*** |                               | 0.000     | 0.000     | 0.001***  |
|                          |                           | (0.003) | (0.003) | (0.003) |                               | (0.002) | (0.002) | (0.002) |                               | (0.000)   | (0.000)   | (0.000)   |
| DLCO %                   |                           | 1.00    | 1.00    | 1.00    |                               | 0.99*** | 0.99**  | 0.99*** |                               | 0.001***  | 0.001**   | 0.002***  |

|                                 |  |         |         |         |  |         |         |         |  |           |           |           |
|---------------------------------|--|---------|---------|---------|--|---------|---------|---------|--|-----------|-----------|-----------|
|                                 |  | (0.003) | (0.004) | (0.003) |  | (0.002) | (0.003) | (0.002) |  | (0.000)   | (0.001)   | (0.000)   |
| Right lung                      |  | 0.93    | 0.93    | 0.91    |  | 1.04    | 1.04    | 1.04    |  | -0.006    | -0.006    | -0.008    |
|                                 |  | (0.097) | (0.12)  | (0.099) |  | (0.073) | (0.062) | (0.076) |  | (0.011)   | (0.009)   | (0.010)   |
| Metastasis                      |  | 0.64    | 0.64    | 0.54    |  | 0.61    | 0.61    | 0.49*   |  | -0.071    | -0.071    | -0.061    |
|                                 |  | (0.34)  | (0.34)  | (0.30)  |  | (0.21)  | (0.21)  | (0.18)  |  | (0.049)   | (0.073)   | (0.045)   |
| Previous cancer-related surgery |  | 0.93    | 0.93    | 0.93    |  | 1.07    | 1.07    | 1.02    |  | 0.000     | 0.000     | 0.000     |
|                                 |  | (0.11)  | (0.11)  | (0.12)  |  | (0.082) | (0.086) | (0.083) |  | (0.012)   | (0.019)   | (0.011)   |
| Cardiac disease                 |  | 0.93    | 0.93    | 0.95    |  | 1.32*** | 1.32**  | 1.42*** |  | -0.017    | -0.017    | -0.047*** |
|                                 |  | (0.14)  | (0.15)  | (0.15)  |  | (0.12)  | (0.19)  | (0.14)  |  | (0.016)   | (0.021)   | (0.014)   |
| COPD                            |  | 1.18    | 1.18    | 1.20    |  | 1.50*** | 1.50*** | 1.47*** |  | -0.050*** | -0.050    | -0.013    |
|                                 |  | (0.14)  | (0.17)  | (0.16)  |  | (0.11)  | (0.20)  | (0.13)  |  | (0.012)   | (0.031)   | (0.012)   |
| Diabetes                        |  | 0.87    | 0.87    | 0.90    |  | 1.05    | 1.05    | 1.04    |  | -0.022    | -0.022*   | -0.026*   |
|                                 |  | (0.13)  | (0.13)  | (0.14)  |  | (0.099) | (0.11)  | (0.10)  |  | (0.015)   | (0.013)   | (0.014)   |
| Connective tissue disease       |  | 0.88    | 0.88    | 0.99    |  | 1.11    | 1.11    | 0.93    |  | -0.004    | -0.004    | 0.020     |
|                                 |  | (0.32)  | (0.30)  | (0.37)  |  | (0.25)  | (0.23)  | (0.22)  |  | (0.035)   | (0.047)   | (0.032)   |
| Chronic kidney disease          |  | 1.21    | 1.21    | 1.10    |  | 2.40*** | 2.40*** | 2.17*** |  | -0.12***  | -0.12***  | -0.053**  |
|                                 |  | (0.32)  | (0.32)  | (0.31)  |  | (0.41)  | (0.41)  | (0.40)  |  | (0.028)   | (0.038)   | (0.025)   |
| Upper lobe                      |  | 0.95    | 0.95    | 0.98    |  | 1.20*** | 1.20*** | 1.25*** |  | -0.033*** | -0.033*** | -0.023**  |
|                                 |  | (0.099) | (0.11)  | (0.11)  |  | (0.084) | (0.078) | (0.092) |  | (0.011)   | (0.012)   | (0.010)   |



|                            |       |         |          |         |       |         |         |         |       |         |         |         |
|----------------------------|-------|---------|----------|---------|-------|---------|---------|---------|-------|---------|---------|---------|
| Clinical nodal involvement |       | 1.42**  | 1.42**   | 1.71*** |       | 1.28**  | 1.28**  | 1.22*   |       | -0.026  | -0.026  | -0.014  |
|                            |       | (0.21)  | (0.24)   | (0.27)  |       | (0.14)  | (0.16)  | (0.14)  |       | (0.017) | (0.021) | (0.016) |
| Clinical stage I           |       | 0.62*** | 0.624*** | 0.57*** |       | 0.82*** | 0.82*** | 0.85**  |       | 0.022*  | 0.022   | 0.022** |
|                            |       | (0.067) | (0.067)  | (0.065) |       | (0.060) | (0.053) | (0.066) |       | (0.012) | (0.018) | (0.011) |
| Healthcare centre dummy    | NO    | NO      | NO       | YES     | NO    | NO      | NO      | YES     | NO    | NO      | NO      | YES     |
| Pseudo R2                  | 0.002 | 0.025   | 0.025    | 0.099   | 0.001 | 0.042   | 0.042   | 0.11    | 0.004 | 0.035   | 0.035   | 0.308   |

\*\*\* p<0.01, \*\* p<0.05, \* p<0.1

Supplemental Table S4. Logistic (1-8) and Tobit (9-12) regressions. All models feature standard errors except for models 3, 7, and 11, where standard errors are corrected for cluster correlation at the healthcare centre level.
